# Supplementary material
Source: HighWire-hosted journal article supplement (https://injuryprevention.bmj.com/content/suppl/2002/12/06/8.4.289)
Supplement: 84289appendix.pdf [file 84289appendix.pdf]

## **Appendix: Community child passenger safety assessment tool**

*Item 1: Is there a mandatory child restraint law for the Tribe? (20 points)*

Source of information: Tribal police chief or designee.

Scoring: primary law = 20 points, secondary law = 10 points, no law = 0 points

*Item 2: Is there vigorous enforcement of the law by the police? (20 points)*

Source of information: police chief and/or police data entry personnel.

Scoring:

(a) Number of tickets issued by Tribal police for violation of the child restraint law in the year 2000 per 100 children 0–4 years of age living at the reservation:

- Highest ratio of tickets/children among the three reservations = 10 points
- Intermediate ratio = 5 points
- Lowest ratio = 0 points

(b) Enforcement and/or public awareness campaigns (“Operation Buckle Down” or any other intensive type of enforcement focusing on increasing child seat use) conducted by Tribal police in the past year:

- More than one = 10 points
- One = 5 points
- No operations = 0 points

*Item 3: Is there a comprehensive car seat distribution program? (25 points)*

Source of information: Tribal child car seat program manager, health educator, public health nurse, or Health and Human Services director.

Scoring:

(a) Is a National Highway Traffic Safety Administration (NHTSA)-certified child seat technician involved with the distribution program? Yes = 5 points, no = 0 points

(b) Ratio of the number of child car seats available for rent or loan per 100 children 0–4 years of age:

- Highest ratio of car seats/children among the three reservations = 10 points
- Intermediate ratio = 5 points
- Lowest ratio = 0 points

(c) Car seat distribution programs provide a hands-on demonstration of car seat installation for the parents or guardians in their vehicles:

- Always demonstrates = 10 points
- Sometimes demonstrates = 5 points
- Never demonstrates = 0 points

*Item 4: Are there community education programs (15 points)*

Source of information: Tribal child seat program manager, safety officer, health educator, public health nurse, Head Start director, and observations of community buildings and health centers.

Scoring:

(a) Does the Tribal program conduct car seat clinics in the communities?

- More than one per year = 5 points
- One per year = 2.5 points
- None conducted = 0 points

(b) Is a NHTSA-certified technician involved with the clinics?

Yes = 2.5 points, no = 0 points

(c) Is there a child passenger safety curriculum targeting children in Head Start?

Yes = 5 points, some Head Start programs = 2.5 points, no = 0 points

(d) Media campaigns (health fairs, public service announcements, billboards, posters, etc) on child passenger safety:

- Yes, widespread activity with a dedicated budget (grant, contract, Tribal or agency funds) = 2.5

points

- Some activity, no dedicated budgeted = 1.5 points
- No media activity = 0 points

*Item 5: Is there a group (for example, agency committee, community task force, or Safe Kids chapter) dedicated to child passenger safety? (10 points)*

Source of information: Tribal safety officer, child seat program manager, health educator, Health and Human Services director, public health nurse, Indian Health Service (IHS) Service Unit director.

Scoring:

- Group with regularly scheduled meetings at least quarterly = 10 points
- Group with non-regular meetings = 5 points
- No group = 0 points

*Item 6: Does the community (Tribe) have access to current data regarding child motor vehicle fatalities and/or hospitalizations? (10 points)*

Source of information: IHS staff, Tribal safety officer, police department staff, and the child seat distribution manager.

Scoring:

- Good data is available on both fatalities and injuries = 10 points
- Some data is available for either fatalities or injuries = 5 points
- No data is available = 0 points
